# Supplementary material for: Prediagnostic circulating metabolites in female breast cancer cases with low and high mammographic breast density
Source: PubMed Central journal article supplement (PMC8219761; doi:10.1038/s41598-021-92508-1), 2021-06-22
Supplement: 41598_2021_92508_MOESM1_ESM.pdf [file 41598_2021_92508_MOESM1_ESM.pdf]

**Journal: Scientific Reports**

**Title:**

Prediagnostic circulating metabolites in female breast cancer cases with low and high mammographic breast density.

**Authors**

Bendinelli B, Vignoli A, Palli D\*, Assedi M, Ambrogetti D, Luchinat C, Caini S, Saieva C, Turano P, Masala G

**Corresponding author**

Domenico Palli, MD

postal address: Cancer Risk Factors and Lifestyle Epidemiology Unit, Institute for Cancer Research, Prevention and Clinical Network (ISPRO), Via Cosimo il Vecchio 2, 50139 Florence, Italy;

e-mail address: [d.palli@ispro.toscana.it](mailto:d.palli@ispro.toscana.it)

telephone number: +39 055 416942 ext: 741

**Supplementary Table 1.** Data completeness for the different metabolites in the 174 low- and high MBD BC cases (87 complete sets). LOQ = limits of quantification.

| Metabolites           | Results outside the measurable range |                     |
|-----------------------|--------------------------------------|---------------------|
|                       | Samples, %                           | Criteria            |
| Creatinine            | 0                                    | <LOQ (<0.01 mmol/L) |
| Alanine               | 0                                    | <LOQ (<0.02 mmol/L) |
| Creatine              | 10.3                                 | <LOQ (<0.01 mmol/L) |
| Glutamic acid         | 40.2                                 | <LOQ (<0.05 mmol/L) |
| Glutamine             | 0                                    | <LOQ (<0.02 mmol/L) |
| Glycine               | 0                                    | <LOQ (<0.10 mmol/L) |
| Histidine             | 0                                    | <LOQ (<0.02 mmol/L) |
| Isoleucine            | 2.3                                  | <LOQ (<0.03 mmol/L) |
| Leucine               | 0                                    | <LOQ (<0.01 mmol/L) |
| Threonine             | 38.5                                 | ≥LOQ (<0.06 mmol/L) |
| Tyrosine              | 0.6                                  | <LOQ (<0.03 mmol/L) |
| Valine                | 0                                    | <LOQ (<0.03 mmol/L) |
| Acetic acid           | 0                                    | <LOQ (<0.01 mmol/L) |
| Citric acid           | 0                                    | <LOQ (<0.03 mmol/L) |
| Formic acid           | 24.7                                 | <LOQ (<0.02 mmol/L) |
| Lactic acid           | 0                                    | <LOQ (<0.03 mmol/L) |
| 3-Hydroxybutyric acid | 50.6                                 | <LOQ (<0.02 mmol/L) |
| Acetone               | 21.8                                 | <LOQ (<0.01 mmol/L) |
| Pyruvic acid          | 7.5                                  | <LOQ (<0.03 mmol/L) |
| Glucose               | 0                                    | <LOQ (<0.47 mmol/L) |
| Glycerol              | 71.8                                 | <LOQ (<0.08 mmol/L) |

**Supplementary Table 2.** Metabolites concentration among low- and high-MBD BC cases (EPIC Florence, low- vs high-MBD BC case-case study).

|                                          | Low MBD cases<br>N = 87 |                | High MBD cases<br>N = 87 |               |
|------------------------------------------|-------------------------|----------------|--------------------------|---------------|
|                                          | Mean (SE)               | 95%CI          | Mean (SE)                | 95%CI         |
| <b>Metabolites (mmol/dm<sup>3</sup>)</b> |                         |                |                          |               |
| Creatine                                 | 0.028 (0.002)           | 0.025 - 0.032  | 0.027 (0.002)            | 0.023 - 0.031 |
| Alanine                                  | 0.455 (0.011)           | 0.434 - 0.476  | 0.407 (0.010)            | 0.388 - 0.426 |
| Creatinine                               | 0.076 (0.002)           | 0.073 - 0.080  | 0.075 (0.002)            | 0.071 - 0.078 |
| Glutamic acid                            | 0.055 (0.003)           | 0.049 - 0.061  | 0.051 (0.003)            | 0.045 - 0.058 |
| Glutamine                                | 0.752 (0.008)           | 0.737 - 0.768  | 0.759 (0.010)            | 0.739 - 0.779 |
| Glycine                                  | 0.293 (0.008)           | 0.277 - 0.309  | 0.318 (0.010)            | 0.298 - 0.338 |
| Histidine                                | 0.086 (0.002)           | 0.083 - 0.089  | 0.086 (0.001)            | 0.083 - 0.088 |
| Isoleucine                               | 0.047 (0.003)           | 0.044 - 0.050  | 0.045 (0.001)            | 0.041 - 0.046 |
| Leucine                                  | 0.095 (0.002)           | 0.091 - 0.100  | 0.088 (0.002)            | 0.084 - 0.093 |
| Threonine                                | 0.102 (0.009)           | 0.084 - 0.120  | 0.121 (0.010)            | 0.102 - 0.140 |
| Tyrosine                                 | 0.061 (0.002)           | 0.059 - 0.064  | 0.054 (0.001)            | 0.051 - 0.056 |
| Valine                                   | 0.229 (0.005)           | 0.219 - 0.239  | 0.214 (0.004)            | 0.206 - 0.223 |
| Acetic acid                              | 0.024 (0.002)           | 0.021 - 0.027  | 0.038 (0.008)            | 0.023 - 0.054 |
| Citric acid                              | 0.148 (0.005)           | 0.137 - 0.158  | 0.163 (0.007)            | 0.148 - 0.177 |
| Formic acid                              | 0.026 (0.001)           | 0.024 - 0.029  | 0.027 (0.001)            | 0.024 - 0.030 |
| Lactic acid                              | 2.070 (0.075)           | 1.922 - 2.219  | 1.857 (0.078)            | 1.703 - 2.011 |
| 3-Hydroxybutyric acid                    | 0.026 (0.003)           | 0.020 - 0.0316 | 0.048 (0.006)            | 0.035 - 0.060 |
| Acetone                                  | 0.013 (0.001)           | 0.011 - 0.015  | 0.017 (0.001)            | 0.015 - 0.019 |
| Pyruvic acid                             | 0.075 (0.003)           | 0.068 - 0.081  | 0.061 (0.004)            | 0.054 - 0.068 |
| Glucose                                  | 4.708 (0.065)           | 4.579 - 4.837  | 4.598 (0.058)            | 4.482 - 4.713 |
| Glycerol                                 | 0.120 (0.014)           | 0.093 - 0.147  | 0.110 (0.013)            | 0.084 - 0.136 |
|                                          |                         |                |                          |               |
| <b>Lipid main fractions (mg/dL)</b>      |                         |                |                          |               |
| Triglycerides                            | 124.3 (5.9)             | 112.7 - 135.9  | 108.7 (7.1)              | 94.6 - 122.7  |
| Cholesterol                              | 239.2 (4.7)             | 230.0 - 248.4  | 228.6 (4.8)              | 219.2 - 238.0 |
| LDL cholesterol                          | 132.5 (3.5)             | 125.7 - 139.3  | 126.2 (3.3)              | 119.7 - 132.7 |
| HDL cholesterol                          | 64.2 (1.3)              | 61.7 - 66.8    | 66.9 (1.4)               | 64.2 - 69.7   |
| APO A1                                   | 164.9 (2.2)             | 160.7 - 169.2  | 166.1 (2.3)              | 161.6 - 170.6 |
| APO A2                                   | 37.1 (0.5)              | 36.1 - 38.1    | 36.8 (0.6)               | 35.7 - 37.9   |
| APO B100                                 | 100.7 (2.6)             | 95.5 - 105.9   | 93.7 (2.5)               | 88.9 - 98.6   |
|                                          |                         |                |                          |               |
| <b>Lipoprotein subfractions (mg/dL)</b>  |                         |                |                          |               |
| LipoproteinMainFractionsTrigVLDL         | 74.0 (4.5)              | 65.1 - 82.8    | 61.6 (5.2)               | 51.3 - 71.9   |
| LipoproteinMainFractionsTrigIDL          | 12.1 (0.9)              | 10.2 - 13.9    | 9.7 (1.2)                | 7.3 - 12.1    |
| LipoproteinMainFractionsTrigLDL          | 21.4 (0.7)              | 20.1 - 22.8    | 20.4 (0.7)               | 19.1 - 21.8   |

|                                  |             |               |             |               |
|----------------------------------|-------------|---------------|-------------|---------------|
| LipoproteinMainFractionsTrigHDL  | 11.5 (0.4)  | 10.8 - 12.3   | 10.9 (0.4)  | 10.1 - 11.8   |
| LipoproteinMainFractionsCholVLDL | 22.6 (1.4)  | 19.8 - 25.4   | 18.6 (1.5)  | 15.5 - 21.6   |
| LipoproteinMainFractionsCholIDL  | 15.2 (0.8)  | 13.5 - 16.9   | 12.8 (0.8)  | 11.2 - 14.5   |
| LipoproteinMainFractionsCholLDL  | 132.5 (3.5) | 125.7 - 139.3 | 126.2 (3.3) | 119.7 - 132.7 |
| LipoproteinMainFractionsCholHDL  | 64.2 (1.3)  | 61.7 - 66.8   | 66.9 (1.4)  | 64.2 - 69.7   |
| LipoprMainFractionsFreeCholVLDL  | 10.1 (0.5)  | 9.0 - 11.2    | 8.5 (0.6)   | 7.3 - 9.7     |
| LipoprMainFractionsFreeCholIDL   | 4.4 (0.2)   | 3.9 - 4.9     | 3.7 (0.2)   | 3.2 - 4.2     |
| LipoprMainFractionsFreeCholLDL   | 39.4 (0.9)  | 37.5 - 41.2   | 38.4 (0.9)  | 36.6 - 40.1   |
| LipoprMainFractionsFreeCholHDL   | 15.2 (0.4)  | 14.5 - 15.9   | 16.1 (0.4)  | 15.3 - 16.9   |
| LipoproteinMainFractionsPhosVLDL | 21.2 (1.2)  | 18.9 - 23.5   | 17.9 (1.2)  | 15.4 - 20.3   |
| LipoproteinMainFractionsPhosIDL  | 8.3 (0.4)   | 7.5 - 9.0     | 7.1 (0.4)   | 6.3 - 8.0     |
| LipoproteinMainFractionsPhosLDL  | 74.8 (1.7)  | 71.5 - 78.1   | 71.7 (1.6)  | 68.5 - 74.9   |
| LipoproteinMainFractionsPhosHDL  | 90.7 (1.7)  | 87.4 - 94.0   | 93.3 (1.7)  | 90.0 - 96.6   |
| LipoproteinMainFractionsApoA1HDL | 166.6 (2.4) | 162.0 - 171.3 | 168.8 (2.4) | 164.0 - 173.6 |
| LipoproteinMainFractionsApoA2HDL | 37.4 (0.5)  | 36.4 - 38.4   | 37.0 (0.6)  | 35.8 - 38.1   |
| LipoproteinMainFractionsApoBVLDL | 8.5 (0.4)   | 7.6 - 9.4     | 7.3 (0.5)   | 6.3 - 8.2     |
| LipoproteinMainFractionsApoBIDL  | 6.1 (0.3)   | 5.5 - 6.6     | 5.3 (0.3)   | 4.8 - 5.8     |
| LipoproteinMainFractionsApoBLDL  | 84.4 (2.2)  | 80.1 - 88.7   | 79.6 (2.0)  | 75.6 - 83.7   |
| SubfractionsTriglyceridesVLDL1   | 32.6 (2.5)  | 27.8 - 37.5   | 25.3 (2.9)  | 19.7 - 31.0   |
| SubfractionsTriglyceridesVLDL2   | 12.0 (0.9)  | 10.2 - 13.8   | 10.2 (1.0)  | 8.2 - 12.3    |
| SubfractionsTriglyceridesVLDL3   | 10.5 (0.8)  | 9.0 - 12.0    | 9.2 (0.9)   | 7.5 - 10.9    |
| SubfractionsTriglyceridesVLDL4   | 8.9 (0.5)   | 8.0 - 9.8     | 7.8 (0.5)   | 6.8 - 8.9     |
| SubfractionsTriglyceridesVLDL5   | 3.3 (0.1)   | 3.1 - 3.4     | 3.0 (0.1)   | 2.9 - 3.2     |
| SubfractionsTriglyceridesLDL1    | 7.1 (0.2)   | 6.6 - 7.5     | 6.9 (0.2)   | 6.4 - 7.3     |
| SubfractionsTriglyceridesLDL2    | 2.7 (0.1)   | 2.6 - 2.9     | 2.7 (0.1)   | 2.5 - 2.9     |
| SubfractionsTriglyceridesLDL3    | 3.1 (0.1)   | 2.9 - 3.3     | 3.0 (0.1)   | 2.9 - 3.2     |
| SubfractionsTriglyceridesLDL4    | 2.9 (0.1)   | 2.6 - 3.1     | 2.6 (0.1)   | 2.3 - 2.8     |
| SubfractionsTriglyceridesLDL5    | 2.9 (0.2)   | 2.5 - 3.2     | 2.5 (0.2)   | 2.2 - 2.8     |
| SubfractionsTriglyceridesLDL6    | 3.8 (0.2)   | 3.5 - 4.1     | 3.7 (0.2)   | 3.4 - 4.1     |
| SubfractionsTriglyceridesHDL1    | 3.5 (0.2)   | 3.1 - 3.9     | 3.6 (0.2)   | 3.3 - 4.0     |
| SubfractionsTriglyceridesHDL2    | 1.8 (0.1)   | 1.7 - 2.0     | 1.7 (0.1)   | 1.5 - 1.9     |
| SubfractionsTriglyceridesHDL3    | 2.4 (0.1)   | 2.2 - 2.5     | 2.2 (0.1)   | 2.0 - 2.4     |
| SubfractionsTriglyceridesHDL4    | 4.0 (0.1)   | 3.8 - 4.2     | 3.7 (0.1)   | 3.4 - 4.0     |
| SubfractionsCholesterolVLDL1     | 7.2 (0.5)   | 6.2 - 8.2     | 5.6 (0.6)   | 4.5 - 6.7     |
| SubfractionsCholesterolVLDL2     | 3.6 (0.3)   | 3.0 - 4.1     | 3.0 (0.3)   | 2.4 - 3.6     |
| SubfractionsCholesterolVLDL3     | 3.8 (0.3)   | 3.2 - 4.4     | 3.1 (0.3)   | 2.5 - 3.7     |
| SubfractionsCholesterolVLDL4     | 6.0 (0.4)   | 5.3 - 6.8     | 5.1 (0.4)   | 4.4 - 5.9     |
| SubfractionsCholesterolVLDL5     | 1.9 (0.1)   | 1.7 - 2.0     | 1.7 (0.1)   | 1.5 - 1.8     |
| SubfractionsCholesterolLDL1      | 31.2 (0.9)  | 29.5 - 32.9   | 30.3 (0.9)  | 28.4 - 32.1   |
| SubfractionsCholesterolLDL2      | 19.8 (0.8)  | 18.2 - 21.4   | 21.3 (0.9)  | 19.4 - 23.1   |
| SubfractionsCholesterolLDL3      | 20.0 (0.8)  | 18.5 - 21.5   | 20.0 (0.9)  | 18.4 - 21.7   |

|                                |            |             |            |             |
|--------------------------------|------------|-------------|------------|-------------|
| SubfractionsCholesterolLDL4    | 20.0 (0.9) | 18.3 - 21.7 | 17.5 (0.8) | 15.9 - 19.2 |
| SubfractionsCholesterolLDL5    | 18.9 (0.9) | 17.1 - 20.6 | 16.0 (0.7) | 14.6 - 17.4 |
| SubfractionsCholesterolLDL6    | 22.6 (0.9) | 20.8 - 24.4 | 21.0 (0.9) | 19.2 - 22.9 |
| SubfractionsCholesterolHDL1    | 18.4 (0.8) | 16.8 - 20.1 | 20.9 (1.0) | 18.8 - 22.9 |
| SubfractionsCholesterolHDL2    | 9.3 (0.3)  | 8.7 - 9.8   | 9.7 (0.3)  | 9.2 - 10.2  |
| SubfractionsCholesterolHDL3    | 12.1 (0.2) | 11.6 - 12.5 | 12.1 (0.2) | 11.7 - 12.6 |
| SubfractionsCholesterolHDL4    | 23.1 (0.4) | 22.3 - 23.8 | 22.9 (0.4) | 22.1 - 23.7 |
| SubfractionsFreeCholesteVLDL1  | 2.3 (0.2)  | 2.0 - 2.7   | 1.7 (0.2)  | 1.3 - 2.1   |
| SubfractionsFreeCholesteVLDL2  | 1.3 (0.1)  | 1.1 - 1.5   | 1.0 (0.1)  | 0.8 - 1.3   |
| SubfractionsFreeCholesteVLDL3  | 1.5 (0.1)  | 1.3 - 1.8   | 1.2 (0.1)  | 0.9 - 1.5   |
| SubfractionsFreeCholesteVLDL4  | 2.5 (0.2)  | 2.2 - 2.8   | 2.0 (0.2)  | 1.7 - 2.3   |
| SubfractionsFreeCholesteVLDL5  | 1.0 (0.0)  | 0.9 - 1.1   | 0.9 (0.0)  | 0.8 - 1.0   |
| SubfractionsFreeCholesterLDL1  | 9.3 (0.3)  | 8.8 - 9.8   | 9.1 (0.3)  | 8.5 - 9.6   |
| SubfractionsFreeCholesterLDL2  | 6.4 (0.2)  | 5.9 - 6.9   | 7.0 (0.3)  | 6.4 - 7.5   |
| SubfractionsFreeCholesterLDL3  | 6.5 (0.2)  | 6.0 - 6.9   | 6.6 (0.2)  | 6.2 - 7.1   |
| SubfractionsFreeCholesterLDL4  | 5.9 (0.2)  | 5.5 - 6.3   | 5.4 (0.2)  | 5.1 - 5.8   |
| SubfractionsFreeCholesterLDL5  | 5.4 (0.2)  | 5.0 - 5.9   | 4.9 (0.2)  | 4.6 - 5.2   |
| SubfractionsFreeCholesterLDL6  | 5.7 (0.2)  | 5.3 - 6.1   | 5.5 (0.2)  | 5.1 - 5.9   |
| SubfractionsFreeCholesterHDL1  | 5.0 (0.2)  | 4.7 - 5.4   | 5.7 (0.2)  | 5.3 - 6.2   |
| SubfractionsFreeCholesterHDL2  | 2.4 (0.1)  | 2.3 - 2.6   | 2.5 (0.1)  | 2.4 - 2.7   |
| SubfractionsFreeCholesterHDL3  | 2.9 (0.1)  | 2.7 - 3.0   | 2.9 (0.1)  | 2.8 - 3.0   |
| SubfractionsFreeCholesterHDL4  | 4.8 (0.1)  | 4.6 - 5.0   | 4.8 (0.1)  | 4.6 - 5.0   |
| SubfractionsPhospholipidsVLDL1 | 5.4 (0.4)  | 4.5 - 6.2   | 4.1 (0.5)  | 3.2 - 5.1   |
| SubfractionsPhospholipidsVLDL2 | 3.1 (0.2)  | 2.7 - 3.6   | 2.7 (0.3)  | 2.2 - 3.2   |
| SubfractionsPhospholipidsVLDL3 | 3.5 (0.2)  | 3.0 - 4.0   | 3.0 (0.3)  | 2.4 - 3.5   |
| SubfractionsPhospholipidsVLDL4 | 5.0 (0.3)  | 4.5 - 5.5   | 4.4 (0.3)  | 3.8 - 4.9   |
| SubfractionsPhospholipidsVLDL5 | 2.2 (0.1)  | 2.0 - 2.3   | 1.9 (0.1)  | 1.7 - 2.1   |
| SubfractionsPhospholipidsLDL1  | 17.5 (0.4) | 16.6 - 18.3 | 17.0 (0.5) | 16.1 - 18.0 |
| SubfractionsPhospholipidsLDL2  | 11.2 (0.4) | 10.4 - 12.0 | 11.9 (0.5) | 11.0 - 12.8 |
| SubfractionsPhospholipidsLDL3  | 11.2 (0.4) | 10.5 - 12.0 | 11.2 (0.4) | 10.4 - 12.1 |
| SubfractionsPhospholipidsLDL4  | 11.2 (0.4) | 10.3 - 12.0 | 9.9 (0.4)  | 9.0 - 10.7  |
| SubfractionsPhospholipidsLDL5  | 10.3 (0.4) | 9.4 - 11.2  | 8.9 (0.4)  | 8.2 - 9.6   |
| SubfractionsPhospholipidsLDL6  | 12.9 (0.4) | 12.0 - 13.8 | 12.2 (0.5) | 11.3 - 13.2 |
| SubfractionsPhospholipidsHDL1  | 23.1 (1.1) | 21.0 - 25.2 | 26.0 (1.2) | 23.6 - 28.4 |
| SubfractionsPhospholipidsHDL2  | 14.8 (0.4) | 14.0 - 15.6 | 15.1 (0.4) | 14.4 - 15.9 |
| SubfractionsPhospholipidsHDL3  | 19.6 (0.4) | 18.9 - 20.3 | 19.5 (0.4) | 18.8 - 20.2 |
| SubfractionsPhospholipidsHDL4  | 32.5 (0.5) | 31.6 - 33.4 | 32.0 (0.5) | 31.0 - 33.0 |
| SubfractionsApoA1HDL1          | 28.5 (1.5) | 25.5 - 31.6 | 33.0 (1.8) | 29.5 - 36.4 |
| SubfractionsApoA1HDL2          | 21.7 (0.5) | 20.7 - 22.7 | 22.3 (0.5) | 21.3 - 23.3 |
| SubfractionsApoA1HDL3          | 31.6 (0.6) | 30.5 - 32.7 | 31.2 (0.6) | 30.0 - 32.3 |
| SubfractionsApoA1HDL4          | 85.6 (1.2) | 83.3 - 87.9 | 83.5 (1.3) | 81.0 - 86.1 |

|                       |            |             |            |             |
|-----------------------|------------|-------------|------------|-------------|
| SubfractionsApoBLDL1  | 16.3 (0.4) | 15.4 - 17.1 | 15.9 (0.5) | 14.9 - 16.8 |
| SubfractionsApoBLDL2  | 11.2 (0.4) | 10.4 - 11.9 | 11.8 (0.5) | 10.9 - 12.7 |
| SubfractionsApoBLDL3  | 11.8 (0.4) | 11.0 - 12.5 | 11.7 (0.4) | 10.8 - 12.5 |
| SubfractionsApoBLDL4  | 12.9 (0.5) | 11.8 - 13.9 | 11.2 (0.5) | 10.2 - 12.2 |
| SubfractionsApoBLDL5  | 13.4 (0.6) | 12.2 - 14.6 | 11.5 (0.5) | 10.4 - 12.5 |
| SubfractionsApoBLDL6  | 18.7 (0.8) | 17.2 - 20.3 | 17.5 (0.8) | 15.9 - 19.0 |
| SubfractionsApoA2HDL1 | 3.1 (0.2)  | 2.8 - 3.4   | 3.5 (0.2)  | 3.1 - 3.8   |
| SubfractionsApoA2HDL2 | 4.1 (0.1)  | 3.9 - 4.3   | 4.1 (0.1)  | 3.9 - 4.3   |
| SubfractionsApoA2HDL3 | 7.6 (0.2)  | 7.3 - 7.9   | 7.4 (0.2)  | 7.1 - 7.8   |
| SubfractionsApoA2HDL4 | 22.4 (0.4) | 21.6 - 23.2 | 21.8 (0.4) | 20.9 - 22.6 |

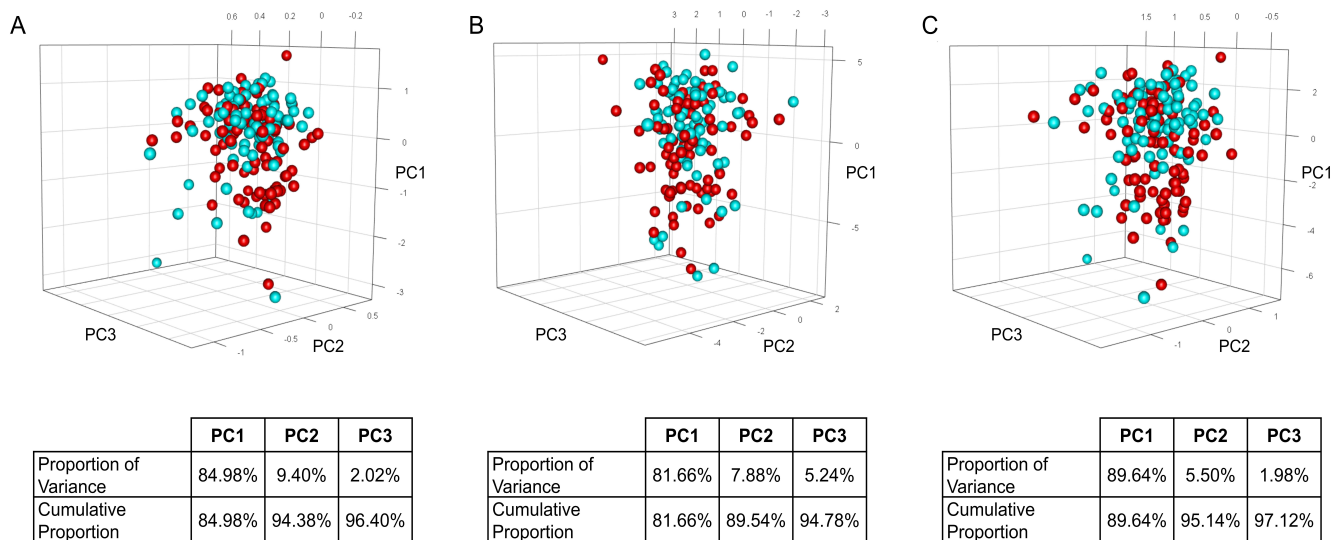

**Supplementary Figure 1.** PCA score plot and explained variance for the comparison of low- (red spheres) and high- (cyan spheres) MDB BC patients. The results are reported for the three kind of NMR spectra acquired, A) NOESY; B) CPMG; and C) Diffusion. (EPIC Florence, low- vs high-MBD BC case-case study).

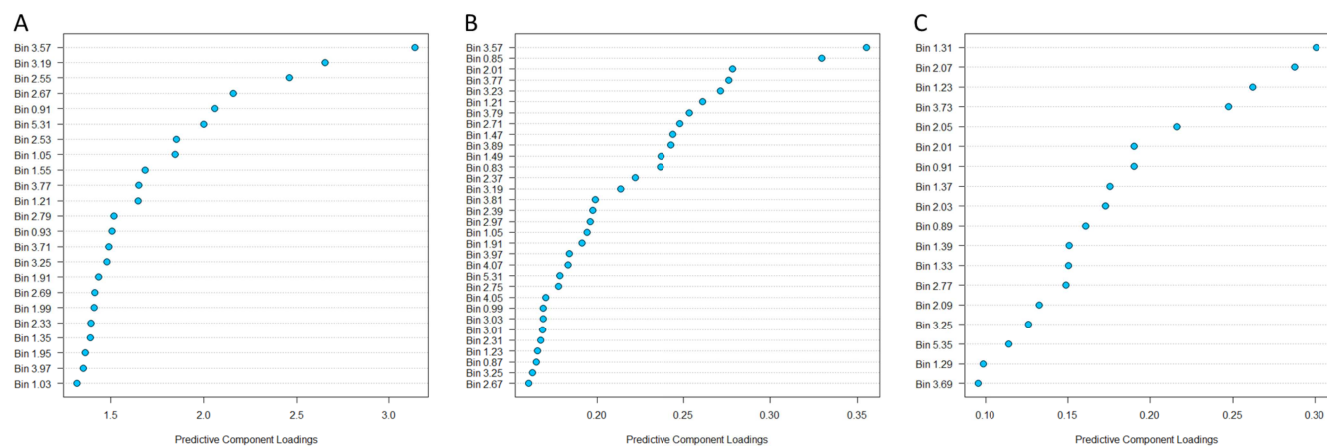

**Supplementary Figure 2.** Loading plots of the predictive component of the OPLS-DA calculated on the  $^1\text{H}$  NMR spectra for the comparison of low- and high-MBD BC patients. The results are reported for the three kind of NMR spectra acquired, A) NOESY; B) CPMG; and C) Diffusion. (EPIC Florence, low- vs high-MBD BC case-case study). Only the bins that showed an intensity higher than two standard deviations of their averages are reported.
